# Supplementary material for: Genome-wide analysis of eukaryotic twin CX9C proteins
Source: Royal Society of Chemistry journal article supplement (doi:10.1039/c0mb00058b), 2010-10-04
Supplement: c0mb00058b_1.pdf [file c0mb00058b_1.pdf]

**Table S1.** List and taxonomic classification of the organisms analyzed in this study.

| <b>Organism</b>                  | <b>Group</b> | <b>Subgroup</b> |
|----------------------------------|--------------|-----------------|
| <i>Homo sapiens</i>              | Animals      | Mammals         |
| <i>Mus musculus</i>              | Animals      | Mammals         |
| <i>Drosophila melanogaster</i>   | Animals      | Insects         |
| <i>Caenorhabditis elegans</i>    | Animals      | Roundworms      |
| <i>Arabidopsis thaliana</i>      | Plants       | Land plants     |
| <i>Oryza sativa</i>              | Plants       | Land plants     |
| <i>Ashbya gossypii</i>           | Fungi        | Ascomycetes     |
| <i>Candida glabrata</i>          | Fungi        | Ascomycetes     |
| <i>Debaryomyces hansenii</i>     | Fungi        | Ascomycetes     |
| <i>Kluyveromyces lactis</i>      | Fungi        | Ascomycetes     |
| <i>Pichia stipitis</i>           | Fungi        | Ascomycetes     |
| <i>Saccharomyces cerevisiae</i>  | Fungi        | Ascomycetes     |
| <i>Schizosaccharomyces pombe</i> | Fungi        | Ascomycetes     |
| <i>Yarrowia lipolytica</i>       | Fungi        | Ascomycetes     |
| <i>Cryptococcus neoformans</i>   | Fungi        | Basidiomycetes  |
| <i>Encephalitozoon cuniculi</i>  | Fungi        | Other fungi     |
| <i>Plasmodium falciparum</i>     | Protists     | Apicomplexans   |
| <i>Trypanosoma cruzi</i>         | Protists     | Kinetoplasts    |
| <i>Entamoeba dispar</i>          | Protists     | Other protists  |
| <i>Entamoeba histolytica</i>     | Protists     | Other protists  |
