# Supplementary material for: Genome-wide analysis of eukaryotic twin CX9C proteins
Source: Royal Society of Chemistry journal article supplement (doi:10.1039/c0mb00058b), 2010-10-04
Supplement: c0mb00058b_5.pdf [file c0mb00058b_5.pdf]

**Table S5.** List of Erv1 homologues in the organisms analyzed in this study. Erv1 homologues were identified using a domain-based approach identical to that described in the Methods to detect proteins containing the Pfam domain Erv1\_Alr.

| <b>Organism</b>           | <b>Gene name</b>      | <b>RefSeq protein accession number</b> |
|---------------------------|-----------------------|----------------------------------------|
| Homo sapiens              | GFER                  | NP_005253.3                            |
| Mus musculus              | Gfer                  | NP_075527.2                            |
| Drosophila melanogaster   | Alr                   | NP_608353.2                            |
| Caenorhabditis elegans    | F56C11.3              | NP_490690.1                            |
| Arabidopsis thaliana      | AT1G49880             | NP_564557.1                            |
| Oryza sativa              | Os03g0206300          | NP_001049318.1                         |
| Ashbya gossypii           | AGOS_ABR037W          | NP_982983.2                            |
| Candida glabrata          | CAGL0G00946g          | XP_446402.1                            |
| Debaryomyces hansenii     | DEHA0A13255g          | XP_456886.1                            |
| Kluyveromyces lactis      | KLLA0B06061g          | XP_451806.1                            |
| Pichia stipitis           | PICST_35383           | XP_001383309.1                         |
| Saccharomyces cerevisiae  | ERV1                  | NP_011543.2                            |
| Schizosaccharomyces pombe | erv1                  | NP_594974.1                            |
| Yarrowia lipolytica       | YALI0D25894g          | XP_503294.1                            |
| Cryptococcus neoformans   | CND03420              | XP_570522.1                            |
| Plasmodium falciparum     | MAL1P2.29             | XP_001351032.1                         |
| Trypanosoma cruzi         | Tc00.1047053430605.40 | XP_805814.1                            |
