# Supplementary material for: Genome-wide analysis of eukaryotic twin CX9C proteins
Source: Royal Society of Chemistry journal article supplement (doi:10.1039/c0mb00058b), 2010-10-04
Supplement: c0mb00058b_6.pdf [file c0mb00058b_6.pdf]

**Table S6.** List of fungal proteins that contain a DUF1690 domain. These proteins were identified using a domain-based approach identical to that described in the Methods to detect proteins containing the Pfam domain DUF1690.

| <b>Organism</b>           | <b>Gene name</b> | <b>RefSeq protein accession number</b> |
|---------------------------|------------------|----------------------------------------|
| Ashbya gossypii           | AGOS_AEL028C     | NP_984833.1                            |
| Candida glabrata          | CAGL0K10516g     | XP_448676.1                            |
| Debaryomyces hansenii     | DEHA0G10065g     | XP_461952.1                            |
| Kluyveromyces lactis      | KLLA0A10769g     | XP_451469.1                            |
| Pichia stipitis           | PICST_51523      | XP_001387356.1                         |
| Saccharomyces cerevisiae  | AIM13            | NP_116666.1                            |
| Schizosaccharomyces pombe | SPBC25H2.09      | NP_596357.1                            |
| Yarrowia lipolytica       | YALI0D02893g     | XP_502345.2                            |
| Cryptococcus neoformans   | CNI03530         | XP_572611.1                            |
